# Supplementary material for: FOXP1 suppresses immune response signatures and MHC class II expression in activated B-cell-like diffuse large B-cell lymphomas
Source: PubMed Central journal article supplement (PMC4777777; doi:10.1038/leu.2015.299), 2015-11-17
Supplement: leu2015299x1.pdf [file leu2015299x1.pdf]

## 1 SUPPLEMENTARY INFORMATION

2

### 3 Methods

#### 4 Gene Ontology (GO) enrichment analysis

5 The transcript expression in siFOXP1 #1- and #2-treated samples detected by the  
6 microarray probes was averaged to yield a consolidated list of gene expression  
7 profile changes in response to FOXP1 knockdown in each of the GCB-DLBCL (DB,  
8 K422) and ABC-DLBCL (OCI-Ly3, HBL-1) cell lines.

9

10 There was a strong correlation between gene expression changes induced by the  
11 two independent FOXP1 targeting siRNAs in each cell line (Pearson  $r > 0.5$ ,  
12  $P < 0.0001$  for all cell lines), and Principal Component Analysis (PCA) was applied to  
13 the samples in order to check for any outlier arrays (Supplementary Figure 1). There  
14 was not sufficient evidence to exclude any arrays.

15

16 To investigate the potential functional processes repressed or induced by FOXP1,  
17 the list of genes exhibiting  $>1.41$ -fold (*i.e.* repressed by FOXP1; the linear value of  
18 1.41 corresponds to 0.5 on  $\log_2$  scale) or  $<1.41$ -fold (*i.e.* induced by FOXP1) were  
19 analyzed separately in Gene Ontology (GO) enrichment analysis by using the open-  
20 access ToppGene Suite<sup>1</sup> (<https://toppgene.cchmc.org/enrichment.jsp>).

21

22 The number of microarray probes, and the corresponding percentage when  
23 compared to the total number of probes present on the array ( $n=41,078$ ),  
24 upregulated by  $>1.41$ -fold used as the input list for the GO enrichment analysis is as  
25 follows: 1) DB ( $n=965$ ; 2.3%); 2) K422 ( $n=1,357$ ; 3.3%); 3) OCI-Ly3 ( $n=1,625$ ; 4.0%);

26 4) HBL-1 (n=2,650; 6.5%). The number and percentage for probes downregulated by  
27 >1.41-fold is as follows: 1) DB (n=2,599; 6.3%); 2) K422 (n=1,573; 3.8%); 3) OCI-Ly3  
28 (n=1,771; 4.3%); 4) HBL-1 (n=2,467; 6.0%).

29

30 Following the GO enrichment analysis using the input lists, each of the four cell lines  
31 contained 50-150 GO terms enriched within their upregulated or downregulated gene  
32 sets. The top 100 GO terms with the lowest FDR values were used for subsequent  
33 analyses. In order to find consensus GO terms within the GCB- or ABC-DLBCL lines,  
34 the GO terms appearing in both DB and K422 (*i.e.* GO terms specific for GCB-  
35 DLBCL) or both OCI-Ly3 and HBL-1 (*i.e.* GO terms specific for ABC-DLBCL) in the  
36 downregulated or upregulated gene sets were shortlisted (Supplementary Table 1).  
37 The common GOs shared by GCB- or ABC-DLBCL cell lines with significant false  
38 discovery rate (FDR;  $P < 0.05$ ) are shown in Figure 2.

39

#### 40 **Data-mining from published microarray datasets**

41 A comparison of *FOXP1* transcript values versus the multiple MHC II genes and their  
42 regulators was performed. Gene Set Enrichment Analysis (GSEA) by using the  
43 Kyoto Encyclopedia of Genes and Genomes (KEGG) database was conducted on  
44 the dataset to examine the biological themes enriched in these DLBCL cases  
45 ( $n=414$ ) according to *FOXP1* expression; gene sets with  $P < 0.05$  and  $FDR < 0.25$  were  
46 considered as significant.<sup>2</sup>

47

#### 48 **Quantification of gene expression by qRT-PCR**

49 The cycle threshold (Ct) was determined for each sample and target gene. Ct values  
50 (FAM dye-labelled Taqman probes used; see Supplementary Table 4) were

51 normalized by subtracting that of an endogenous housekeeping gene (VIC dye-  
52 labeled *TBP* TaqMan probe: 4326322E; Applied Biosystems;  $\Delta\text{Ct} = \text{Ct FAM} - \text{Ct}$   
53 VIC). The expression of gene-specific mRNA in the *siFOXP1*-treated samples,  
54 relative to those of negative control-treated, was normalized using *TBP* and  
55 calculated by subtracting the normalized Ct values obtained from control samples  
56 ( $\Delta\Delta\text{Ct} = \Delta\text{Ct}$  of *siFOXP1*-treated -  $\Delta\text{Ct}$  of negative control-treated) to determine  
57 relative expression ( $2^{-\Delta\Delta\text{Ct}}$ ). Hence, gene expression levels from *siFOXP1*-treated  
58 cells were presented relative to those of control cells.

59

## 60 **References**

- 61 1. Chen J, Bardes EE, Aronow BJ, Jegga AG. ToppGene Suite for gene list enrichment  
62 analysis and candidate gene prioritization. *Nucleic acids research* 2009 Jul; **37**(Web  
63 Server issue): W305-311.
- 64 2. Subramanian A, Tamayo P, Mootha VK, Mukherjee S, Ebert BL, Gillette MA, *et al.*  
65 Gene set enrichment analysis: A knowledge-based approach for interpreting  
66 genome-wide expression profiles. *Proceedings of the National Academy of Sciences*  
67 *of the United States of America* 2005 Oct 25; **102**(43): 15545-15550.

68

69

70

71

72

73

74

75

76

77

78

79 **Supplementary Table 1** List of Gene Ontology (GO) terms enriched in FOXP1-  
80 depleted ABC-DLBCL (OCI-Ly3 and HBL-1) or GCB-DLBCL (DB and K422) cells.

81

82 **Supplementary Table 2** List of genes contributing to the GSEA core enrichment on  
83 a negative scale for “antigen processing and presentation” (hsa04612; KEGG  
84 database) gene set according to four independent *FOXP1* microarray probes.

85

86

87 **Supplementary Table 3. List of antibodies used for Western blotting or**  
 88 **immunohistochemistry experiments**

| Antibody   | Identifier | Host species | Supplier / Source                          | Dilution                               | Isotype     |
|------------|------------|--------------|--------------------------------------------|----------------------------------------|-------------|
| FOXP1      | JC12       | Mouse        | Banham AH (University of Oxford, UK)       | 1:30 (WB)<br>1:80 (IHC)<br>5 µg (ChIP) | IgG2a       |
| FOXP1      | Ab16645    | Rabbit       | Abcam (Cambridge, UK)                      | 5 µg (ChIP)                            | Poly-clonal |
| Control    | X-0943     | Mouse        | Dako, Agilent Technologies (Cambridge, UK) | 5 µg (ChIP)                            | IgG2a       |
| Control    | X-0903     | Rabbit       | Dako, Agilent Technologies (Cambridge UK)  | 5 µg (ChIP)                            | Poly-clonal |
| HLA-DRA-PE | 12-9956-42 | Mouse        | eBioscience (San Diego, CA)                | 1:200 (FC)                             | IgG2b       |
| CD74-PE    | 12-0748-42 | Mouse        | eBioscience (San Diego, CA)                | 1:200 (FC)                             | IgG1        |
| HLA-DRA    | LN-3       | Mouse        | Abcam (Cambridge, UK)                      | 1:50 (IHC)                             | IgG2b       |
| Beta-Actin | AC-15      | Mouse        | Sigma (St Louis, MO)                       | 1:20,000 (WB)                          | IgG1        |

89 WB: Western blotting; IHC: Immunohistochemistry; FC: Flow cytometry; ChIP:  
 90 chromatin immunoprecipitation; PE: phycoerythrin.

91

92 **Supplementary Table 4. List of Taqman primers and probes (Taqman Gene**  
93 **Expression Assays from Applied Biosystems, Life Technologies)**

| <b>Gene name</b> | <b>Assay ID</b> |
|------------------|-----------------|
| <i>CHAC1</i>     | Hs00225520_m1   |
| <i>C1orf38</i>   | Hs00985482_m1   |
| <i>VNN2</i>      | Hs00190581_m1   |
| <i>SYT17</i>     | Hs00204928_m1   |
| <i>LPP</i>       | Hs00194400_m1   |
| <i>FCRL5</i>     | Hs00258709_m1   |
| <i>NEIL1</i>     | Hs00226327_m1   |
| <i>FCGBP</i>     | Hs01553051_m1   |
| <i>LHFPL2</i>    | Hs00299613_m1   |
| <i>SLC7A11</i>   | Hs00204928_m1   |

94 Taqman MGB probe has 5' FAM reporter dye and 3' non-fluorescent quencher.

95

96

**Supplementary Table 5. List of primers used for chromatin**

97

**immunoprecipitation (ChIP) experiments**

| <b>Gene name</b> | <b>Forward primer sequence</b> | <b>Reverse primer sequence</b> |
|------------------|--------------------------------|--------------------------------|
| <i>CHAC1</i>     | TGGGGAGACCCCATCTCTAT           | GGCTCAAGCAATCCTCTCAC           |
| <i>LPP</i>       | TTTTGTGGTTTCTACCTTTGACA        | CCAGGCTAAGGAAGTCACAGA          |
| <i>NEIL1</i>     | CCATCAGTTTTGTGAGGGAAA          | GAAAGCCTAATAACCCCAAGC          |
| <i>VNN2</i>      | ATCATGGGACTACCCTGTGG           | CCTAGCTGGAAAAGATGTGGA          |

98

99

100

101  
102  
103

**Supplementary Table 6. Data mining of ChIP-seq data from van Keimpema et al<sup>39</sup> illustrating FOXP1 promoter occupancy at *CD74*, *HLA* and *CIITA* loci**

| Gene            | No. of ChIP-seq peaks in ABC-DLBCL cell lines |          | No. of ChIP-seq peaks in GCB-DLBCL cell lines |         |
|-----------------|-----------------------------------------------|----------|-----------------------------------------------|---------|
|                 | OCI-Ly3                                       | OCI-Ly10 | OCI-Ly1                                       | OCI-Ly7 |
| <i>CD74</i>     | 2                                             | 2        | 2                                             | 1       |
| <i>HLA-DMA</i>  | 2                                             | 2        | 1                                             | 6       |
| <i>HLA-DMB</i>  | 1                                             | -        | 2                                             | 2       |
| <i>HLA-DOA</i>  | -                                             | -        | -                                             | 1       |
| <i>HLA-DOB</i>  | -                                             | -        | -                                             | 2       |
| <i>HLA-DPA1</i> | -                                             | 1        | 1                                             | 2       |
| <i>HLA-DPB1</i> | -                                             | -        | 1                                             | 1       |
| <i>HLA-DPB2</i> | -                                             | -        | -                                             | -       |
| <i>HLA-DQA1</i> | 2                                             | -        | 3                                             | 2       |
| <i>HLA-DQA2</i> | -                                             | -        | -                                             | -       |
| <i>HLA-DQB1</i> | -                                             | -        | -                                             | 1       |
| <i>HLA-DQB2</i> | -                                             | -        | -                                             | -       |
| <i>HLA-DRA</i>  | 2                                             | -        | 2                                             | 3       |
| <i>HLA-DRB1</i> | -                                             | -        | -                                             | -       |
| <i>HLA-DRB5</i> | -                                             | -        | -                                             | -       |
| <i>HLA-DRB6</i> | -                                             | -        | -                                             | 1       |
| <i>CIITA</i>    | 5                                             | 8        | 1                                             | 6       |

104 Note: The UCSC reference genome (hg19/GRCh37) was used to retrieve the  
105 chromosomal locations for each gene of interest. Several FOXP1 ChIP-seq peaks  
106 were observed around the transcription start site (TSS) of the *HLA* (within 10kb  
107 window of TSS), *CD74* and *CIITA* (within 20kb window of TSS) genes in all four  
108 DLBCL cell lines.

109  
110



111  
112  
113  
114  
115  
116  
117  
118  
119  
120  
121  
122  
123  
124  
125  
126  
127  
128  
129  
130

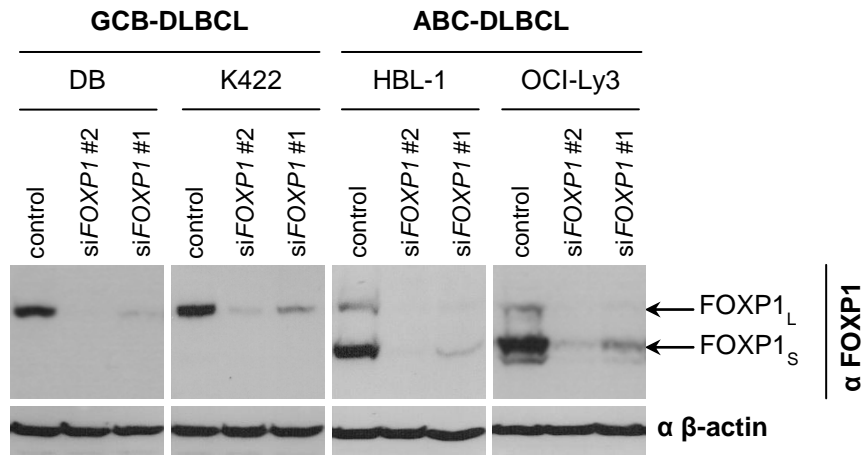

**Supplementary Figure 1.** FOXP1 depletion in GCB- and ABC-DLBCL cell lines. Analysis of FOXP1 targeting by Western blotting showed efficient knockdown with both independent siRNAs in DB and K422 (GCB-DLBCL), and HBL-1 and OCI-Ly3 (ABC-DLBCL) cell lines after 48h.  $\beta$ -actin was used as a loading control (bottom panel).

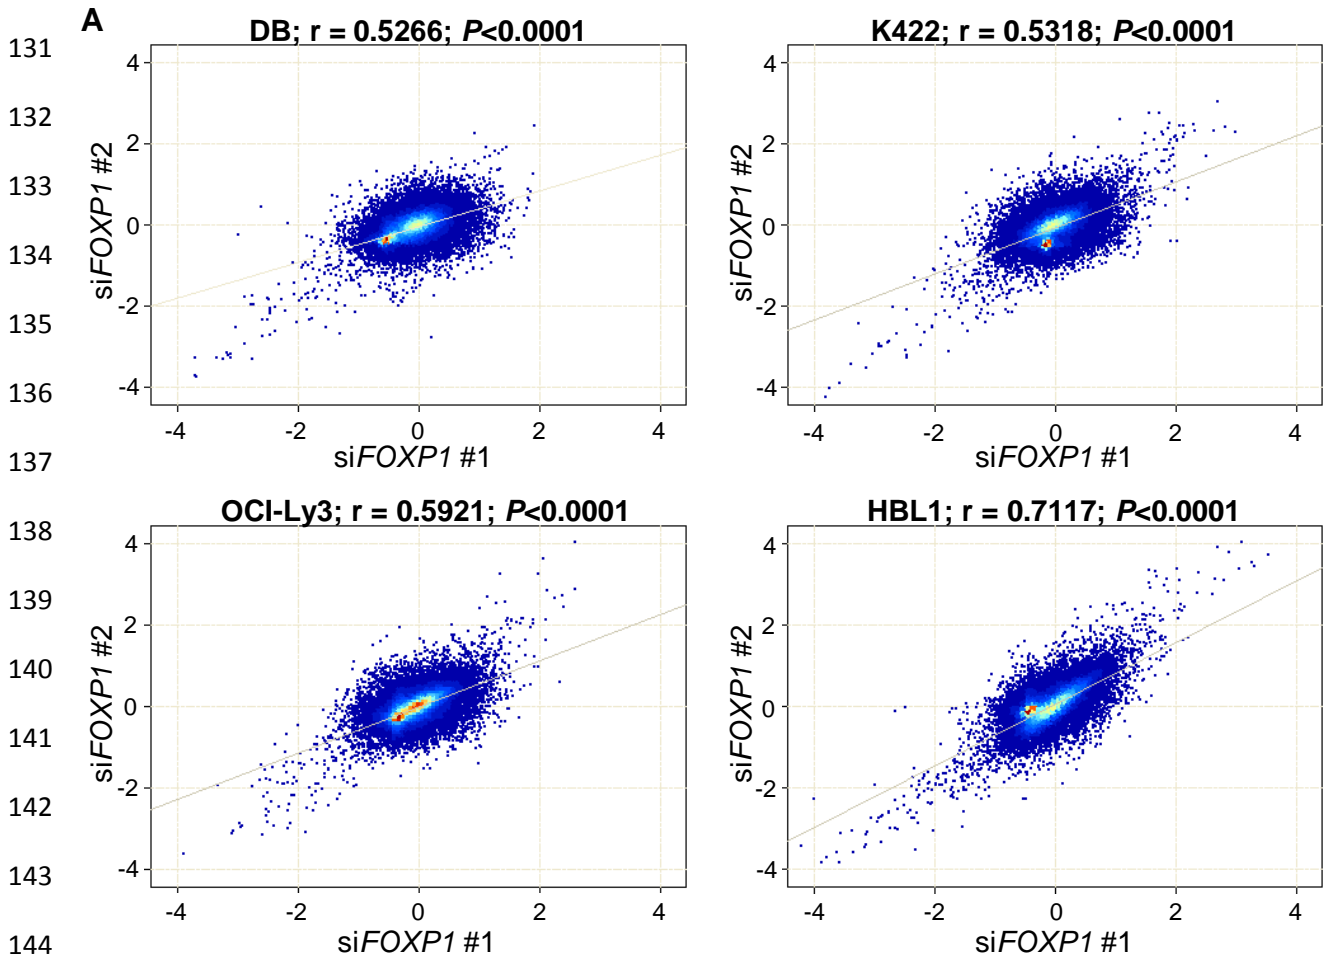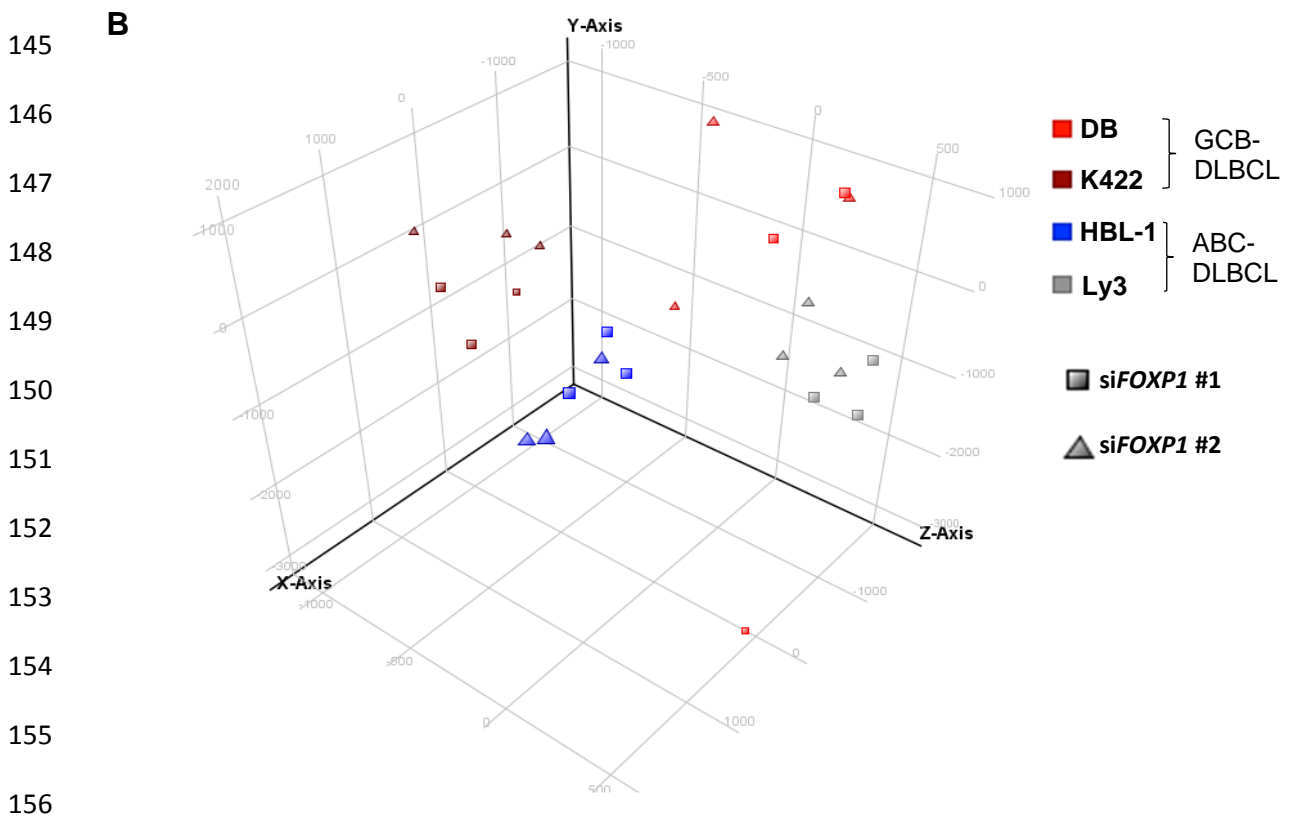

157 **Supplementary Figure 2.** Quality control for FOXP1-targeting siRNAs used in  
158 microarray analysis. **(A)** Scatter plots of *siFOXP1* #1 vs *siFOXP1* #2 for DB, K422,  
159 HBL-1 and OCI-Ly3 showed good correlation between genes regulated by each  
160 siRNA. **(B)** Principal component analysis includes filtered data passing quality  
161 control flags, and represents 30,113 of 41,078 probes. The primary contributor to  
162 variance was determined by the cell line, as replicate experiments cluster in similar  
163 patterns for both siRNAs in each cell line. While DB contained an outlier on the  
164 second principal component there was no experimental reason to exclude the data,  
165 which might represent true variability. Thus on this basis all arrays were included in  
166 subsequent analyses.

167

168

169

170

171

172

173

174

175

176

177

178

179

180

181

182

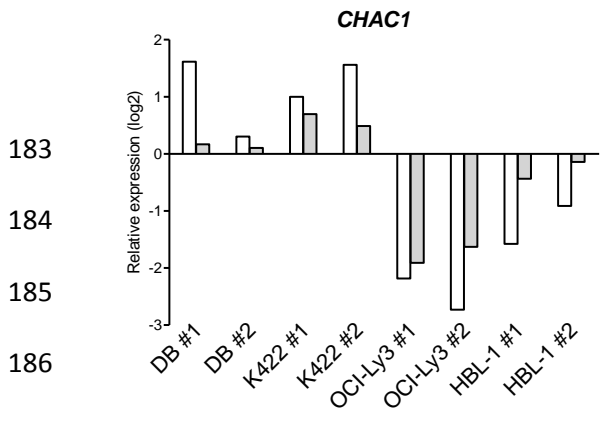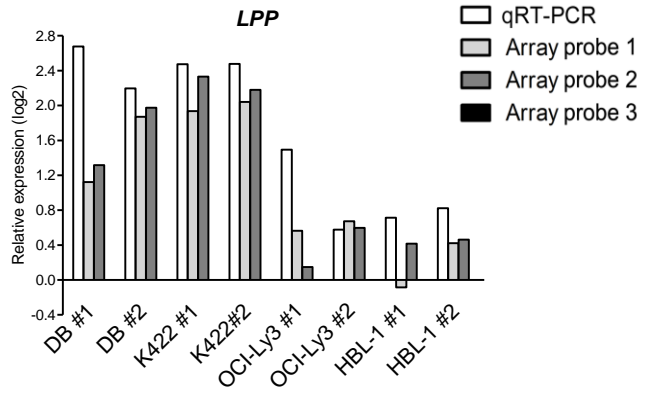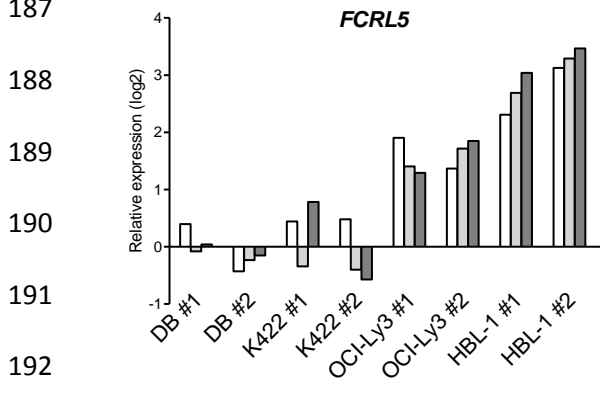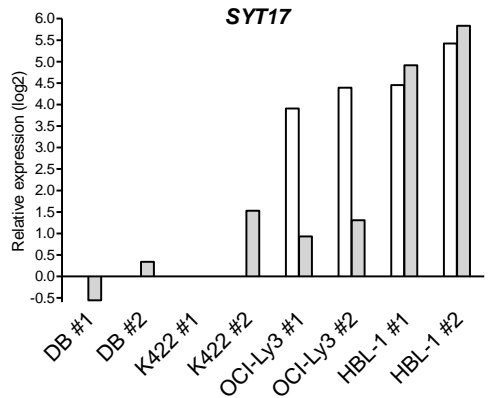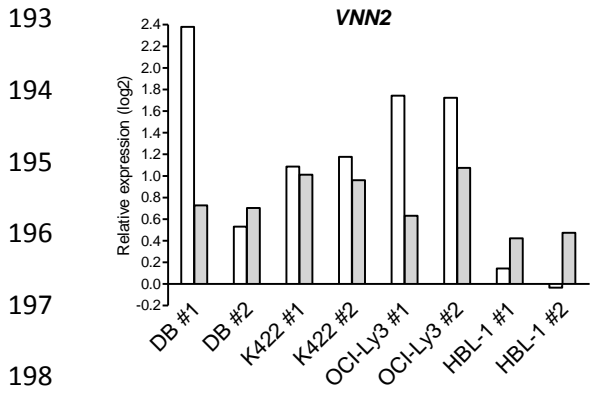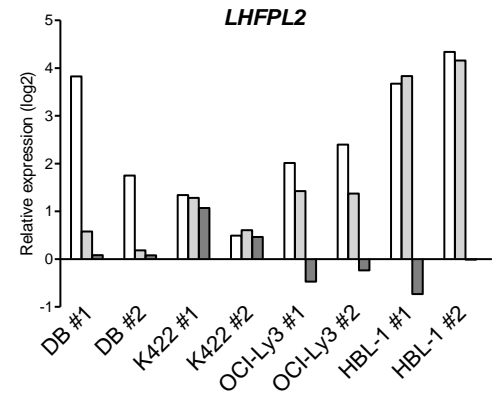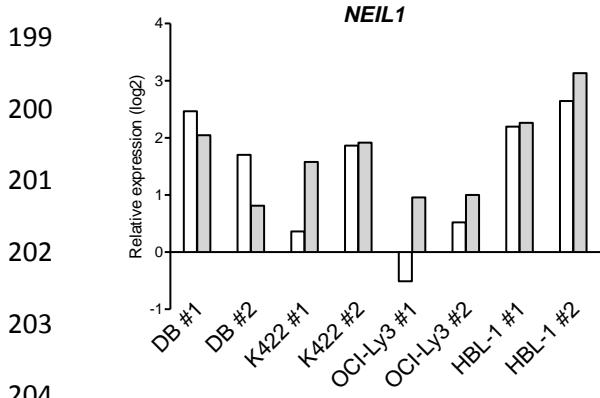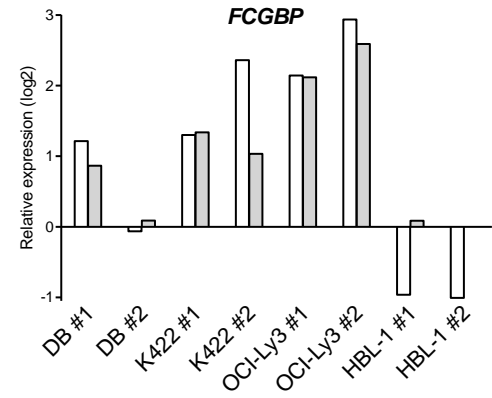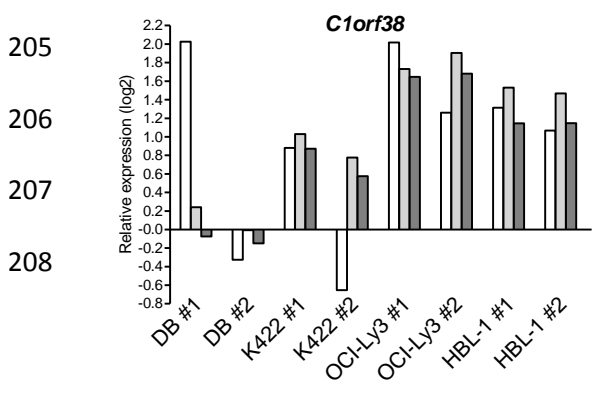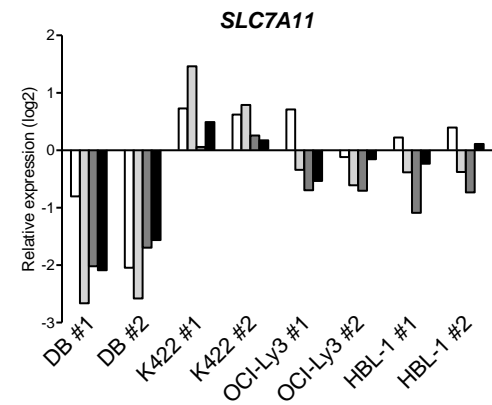

209 **Supplementary Figure 3.** Validation of microarray data for selected genes by qRT-  
210 PCR. qRT-PCR analysis carried out on cDNA prepared from the same RNA samples  
211 used for microarray experiments, and compared to data obtained from microarray  
212 (some genes on the Agilent arrays are represented by multiple probes and thus data  
213 are shown for each probe). #1 represents siFOXP1#1-treated cells; #2 represents  
214 siFOXP1#2-treated cells.

215

216

217

218

219

220

221

222

223

224

225

226

227

228

229

230

231

232

233

234

235

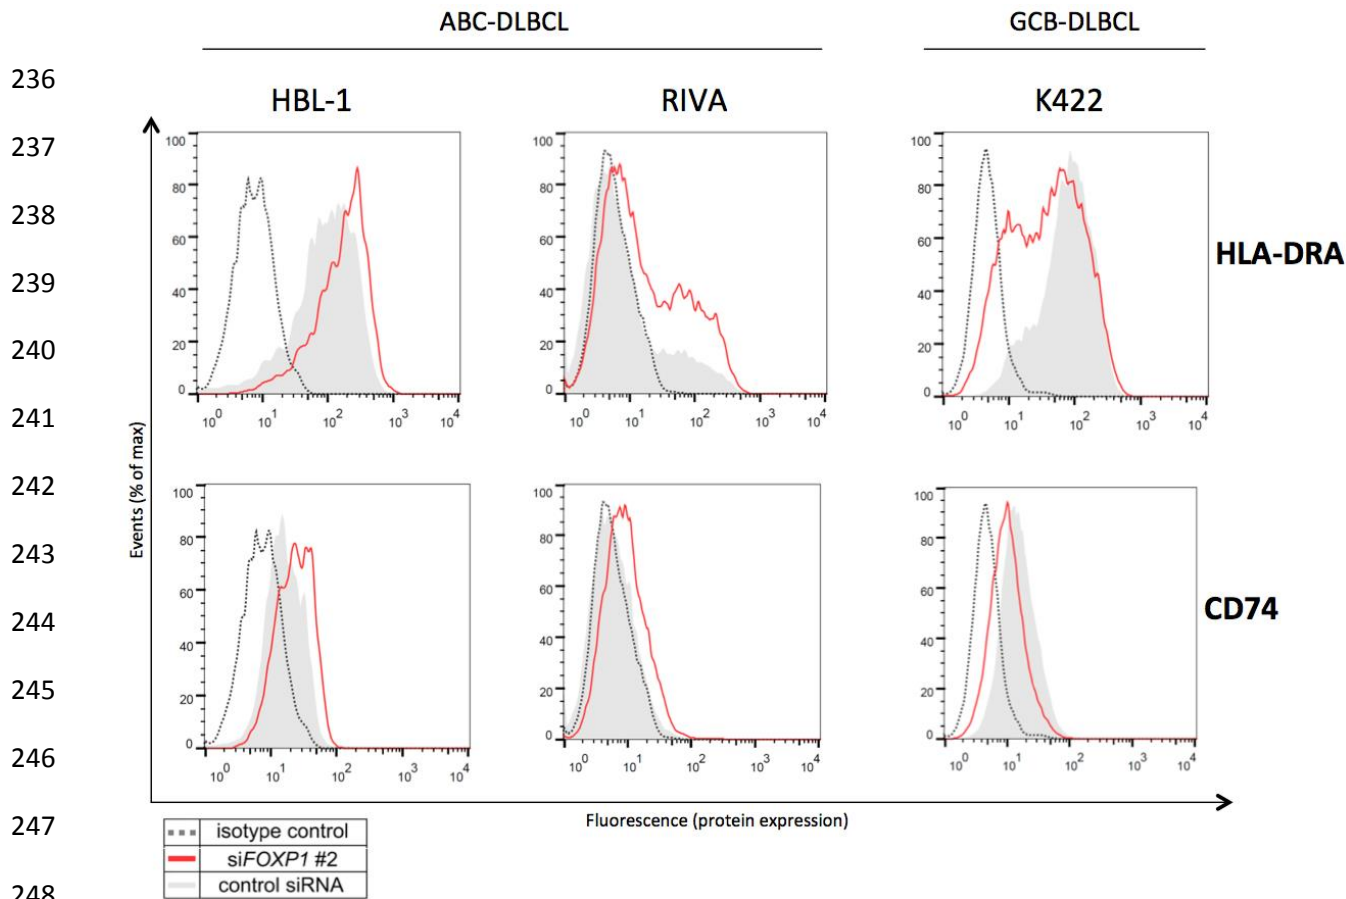

249 **Supplementary Figure 4.** Knockdown of FOXP1 in the ABC-DLBCL cell lines HBL-  
 250 1 and RIVA increased both HLA-DRA and CD74 expression on the cell surface,  
 251 although to a lesser extent than observed in OCI-Ly3 cells (Figure 4A). In contrast,  
 252 FOXP1 silencing in the GCB-DLBCL cell line Karpas 422 (K422) reduced both HLA-  
 253 DRA and CD74 expression. Thus it is possible that the long isoform of FOXP1 may  
 254 drive HLA-DRA and CD74 expression in GCB-DLBCL. This is consistent with  
 255 reduced MHC II transcript expression on FOXP1 silencing in GCB-DLBCL cell lines  
 256 (Figure 3A), the identification of a subset of primary DLBCL with high FOXP1 and  
 257 HLA-DRA protein expression and published CHIP-seq data<sup>39</sup> from GCB-DLBCL cell  
 258 lines showing FOXP1 MHC II, *CIITA* and *CD74* promoter occupancy. Flow cytometry  
 259 plots shown are representative of three independent experiments.

260

261

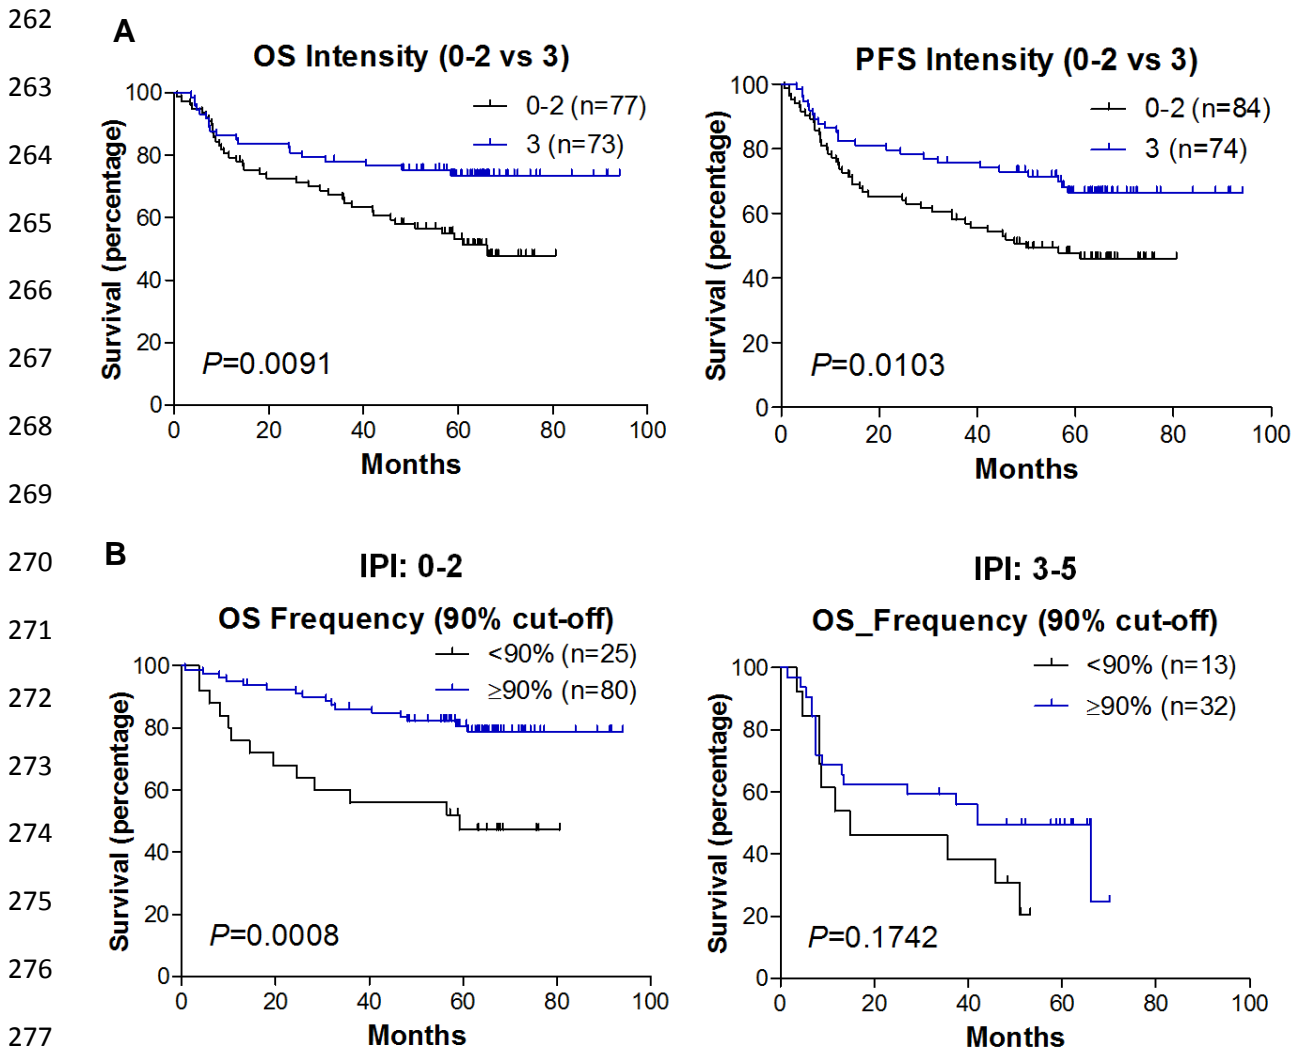

279 **Supplementary Figure 5.** Qualitative HLA-DRA scores significantly predict clinical  
 280 outcome and reduced frequency HLA-DRA expression identifies high-risk DLBCL  
 281 patients with low-risk IPI scores. **(A)** OS (left panel) and PFS (right panel) in patients  
 282 according to qualitative scoring with low (0 – 2) versus high intensity (3) HLA-DRA  
 283 expression. Patients with high intensity HLA-DRA expression showed better survival  
 284 (OS  $P=0.0091$  and PFS  $P=0.0103$ ). **(B)** Reduced frequency HLA-DRA (<90%)  
 285 expression identified a group of DLBCL patients with inferior outcome in the low (0 –  
 286 2) risk IPI (International Prognostic Index) group ( $P=0.0008$ ). In patients with high-  
 287 risk (3 – 5) IPI scores, the frequency of HLA-DRA expression did not impact on their  
 288 clinical outcome ( $P=0.1742$ ).

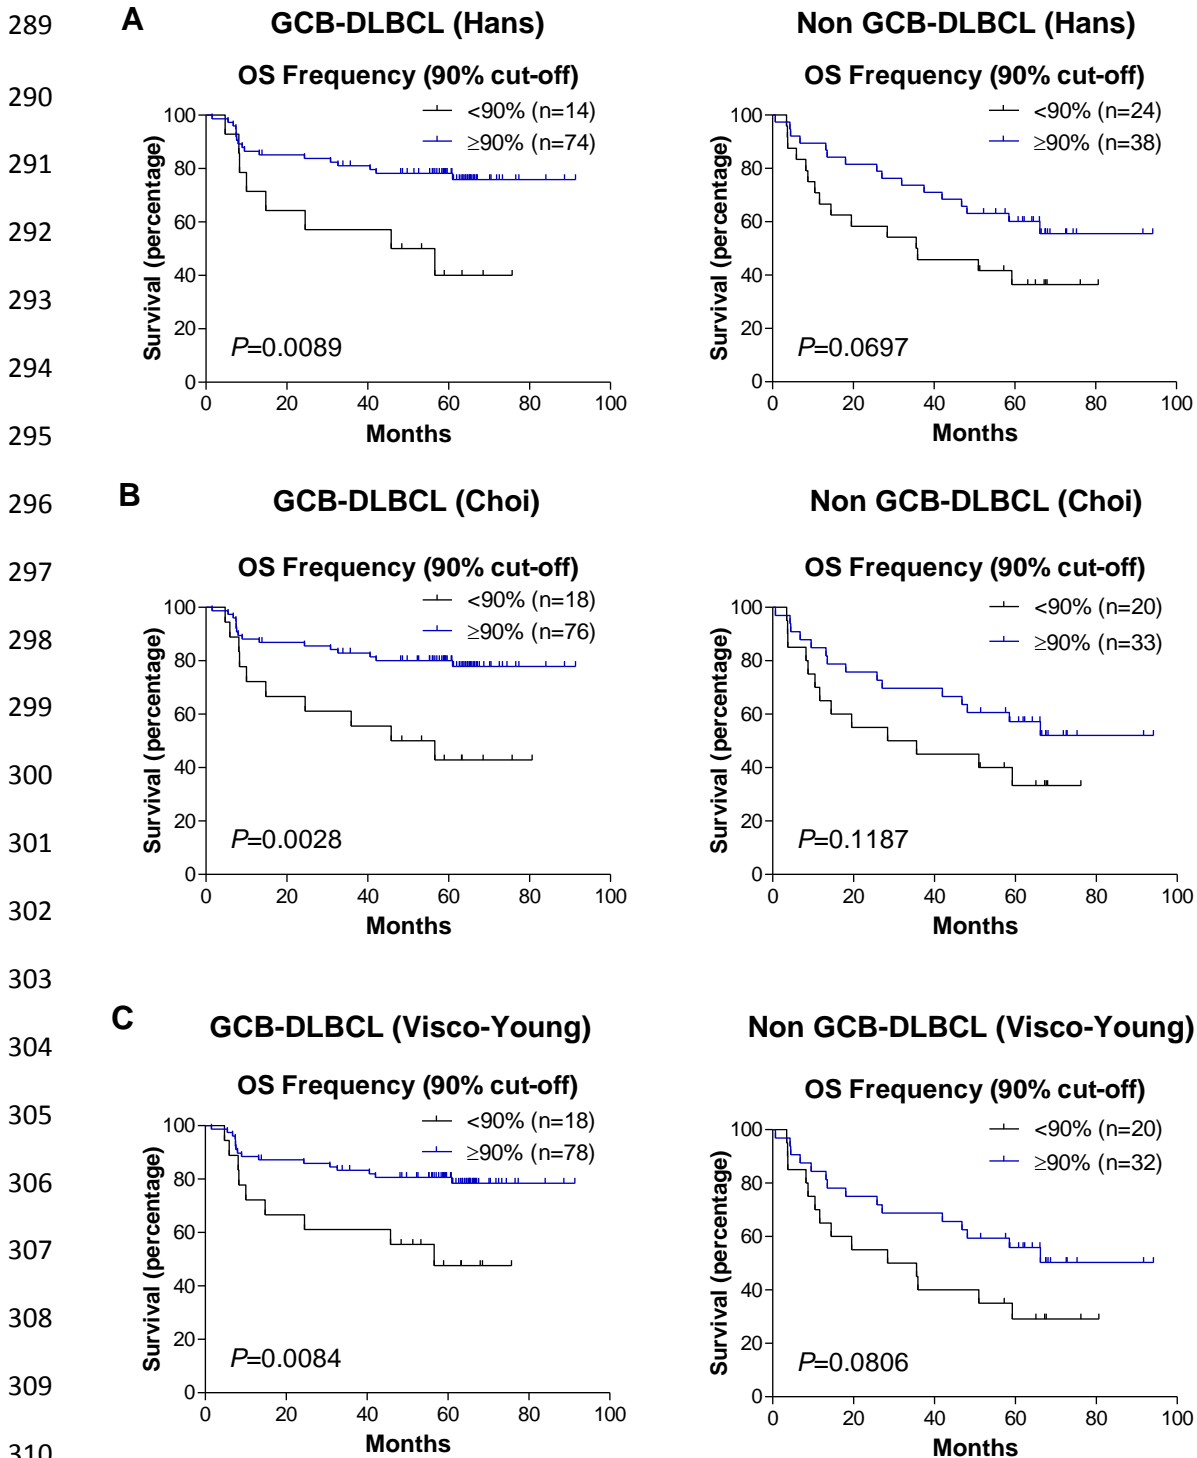

311 **Supplementary Figure 6.** Comparison of overall survival according to the frequency  
 312 of HLA-DRA expression in GCB or non-GCB DLBCL patients. DLBCL cases COO  
 313 subtyped into GCB or non-GCB categories, according to (A) Hans, (B) Choi and (C)  
 314 Visco-Young algorithms, to analyze the impact of reduced frequency HLA-DRA  
 315 expression on overall survival (OS). Reduced frequency of HLA-DRA expression



316 also identified a subgroup of high-risk GCB-DLBCL patients, defined by all three  
317 algorithms, who were incurable with R-CHOP. There was a trend towards reduced  
318 frequency of HLA-DRA expression and poor OS in non-GCB DLBCL but this was not  
319 significant.

320

321

322

323

324

325

326

327

328

329

330

331

332

333

334

335

336

337

338

339

340

341

342

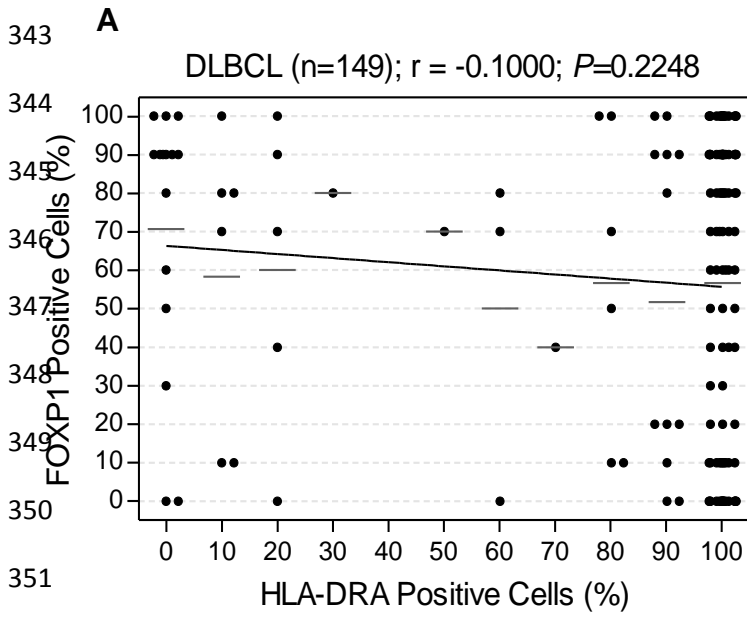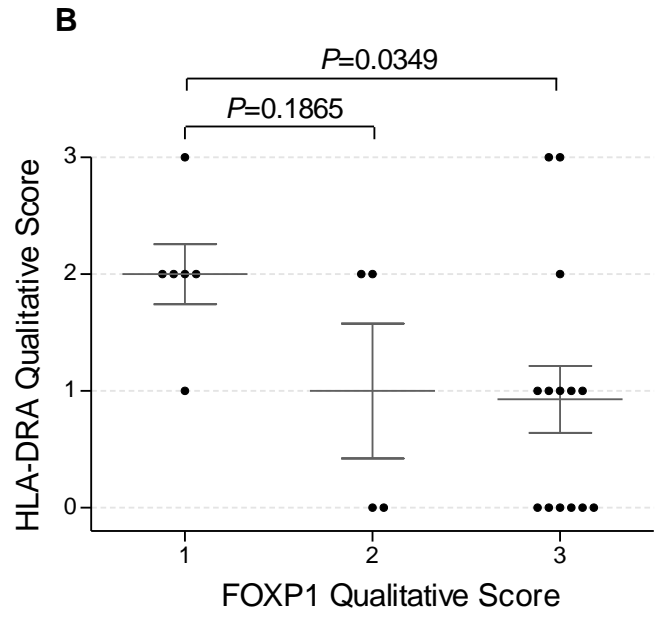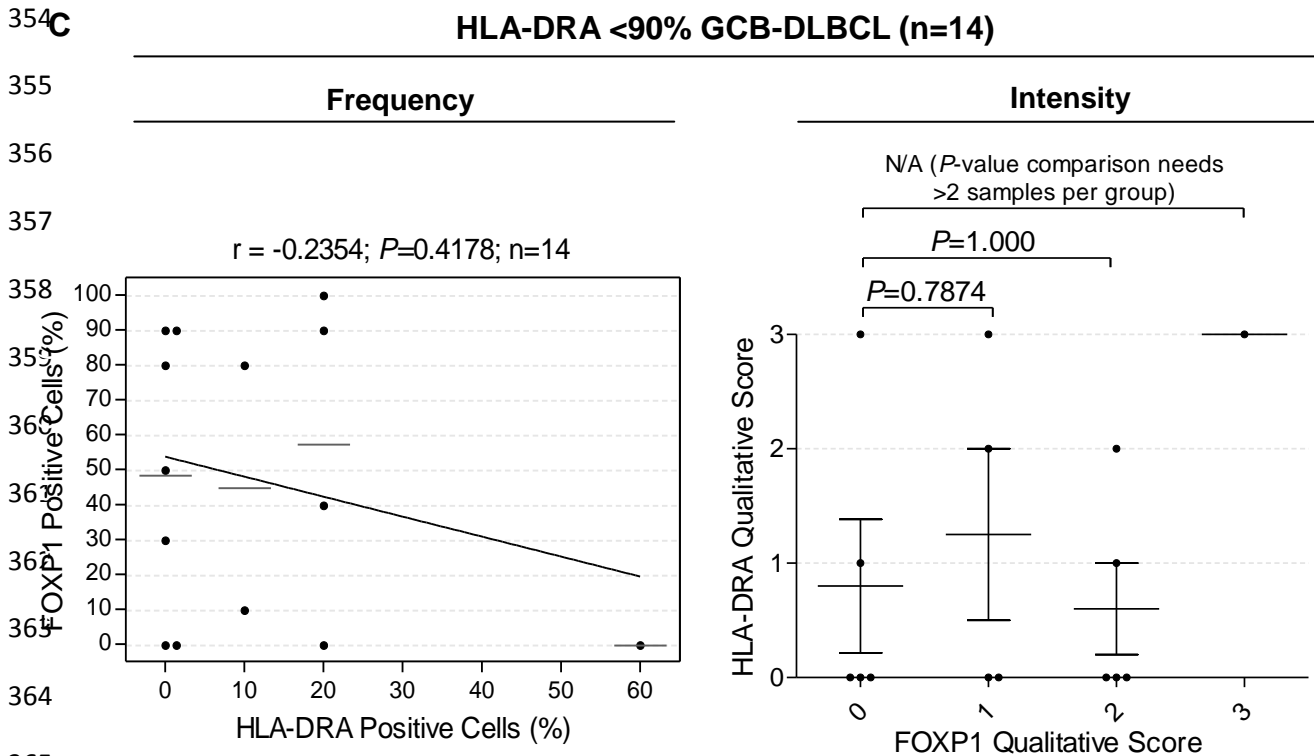

370 **D**

**All DLBCL (n=149)**

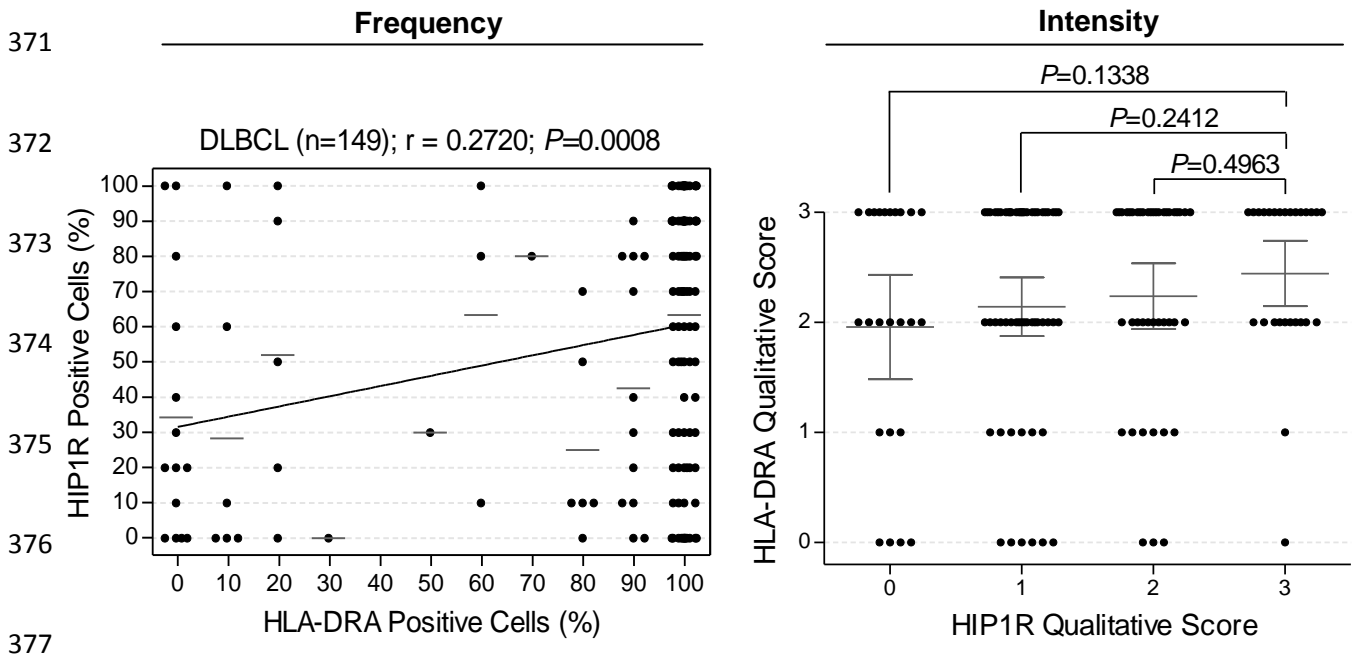

378 **Supplementary Figure 7.** Relationship between FOXP1 and HLA-DRA (in all  
 379 DLBCL cases or <90% expression frequency in GCB-DLBCL [n=14] subtype) or  
 380 HIP1R (all DLBCL cases [n=149]). **(A)** FOXP1 and HLA-DRA quantitative frequency  
 381 scores in primary R-CHOP treated DLBCL (n=149) were not significantly correlated  
 382 (r=-0.1000, P=0.2248). **(B)** Significant inverse correlation between FOXP1 and HLA-  
 383 DRA (<90% frequency expression) in non-GCB DLBCL cases (n=24) was observed  
 384 by intensity (P=0.0349). **(C)** No significant relationship was observed in GCB-  
 385 DLBCL cases between FOXP1 and HLA-DRA (<90% frequency). **(D)** HLA-DRA and  
 386 HIP1R quantitative scores in all the DLBCL cases (n=149) demonstrated a  
 387 significant positive relationship (r=0.2720, P=0.0008) (left panel), while qualitative  
 388 scores did not identify significant correlations between HLA-DRA and HIP1R  
 389 expression (right panel).

390

391
